# Supplementary material for: NOACs versus warfarin for stroke prevention in patients with AF: a systematic review and meta-analysis
Source: HighWire-hosted journal article supplement (doi:10.1136/openhrt-2015-000279), 2016-01-01

## Supplementary Appendix Figures

Supplementary Appendix Figure 1 Study flow diagram

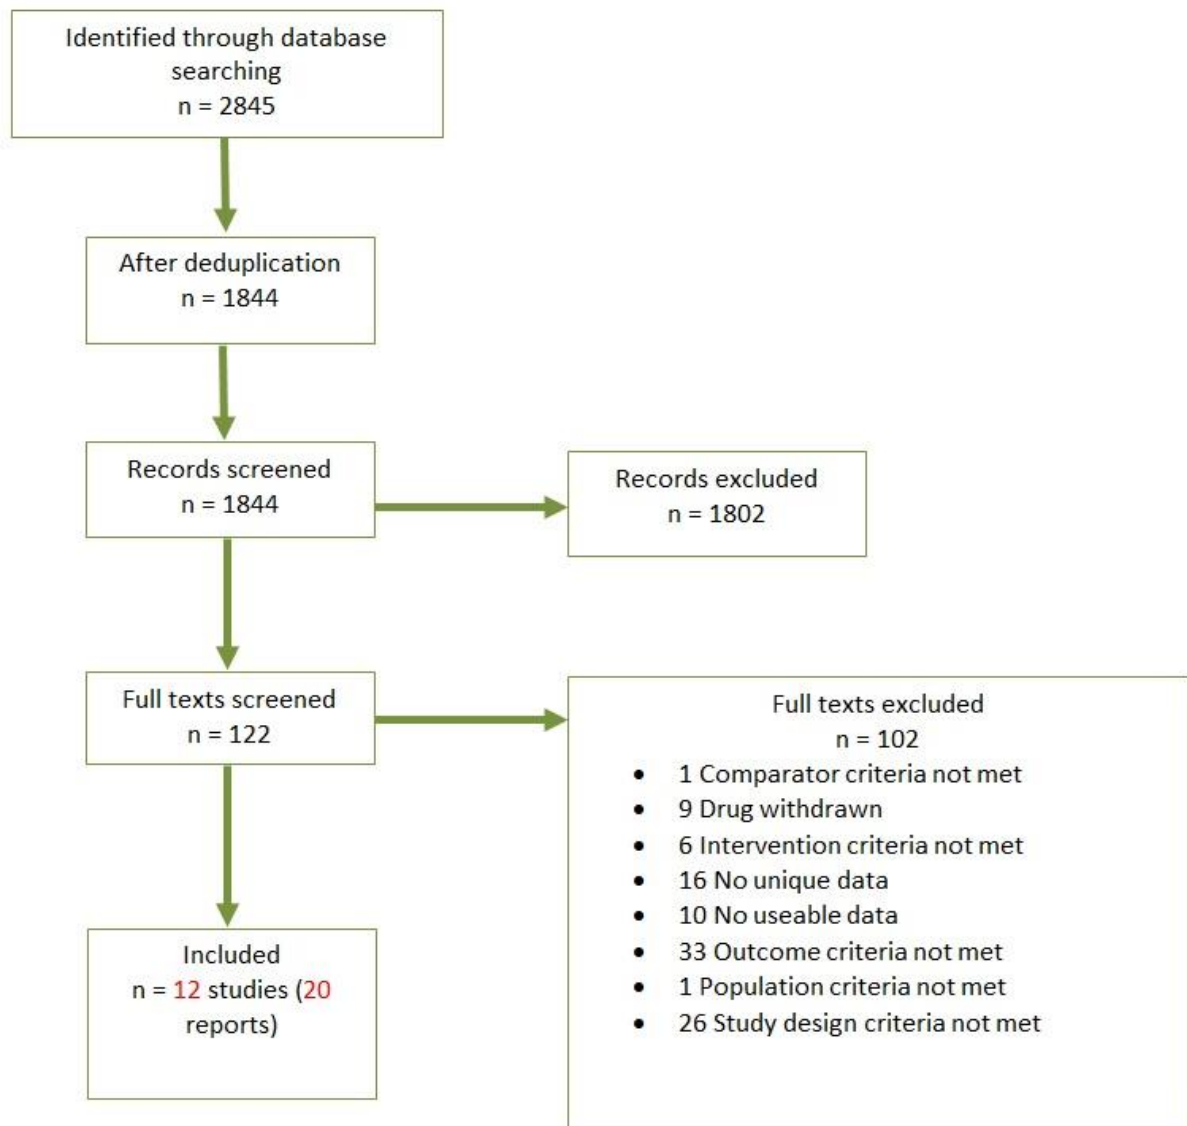

## Supplementary Appendix Figure 2. Base line characteristics

| Study ID, setting, trial registration no.                                                                                       | Intervention drug & dosage                                                                                                                              | Participants                                     |                                                                      |                                                             | Outcomes                                                                                                                                                                                                                                              |
|---------------------------------------------------------------------------------------------------------------------------------|---------------------------------------------------------------------------------------------------------------------------------------------------------|--------------------------------------------------|----------------------------------------------------------------------|-------------------------------------------------------------|-------------------------------------------------------------------------------------------------------------------------------------------------------------------------------------------------------------------------------------------------------|
|                                                                                                                                 | Warfarin                                                                                                                                                | Number randomised (% male)                       | Age, years mean (SD)                                                 | CHADS <sub>2</sub> score ≥ 3 (n, %)                         |                                                                                                                                                                                                                                                       |
| Factor Xa Phase III trials                                                                                                      |                                                                                                                                                         |                                                  |                                                                      |                                                             |                                                                                                                                                                                                                                                       |
| ARISTOTLE (Granger 2011 + other secondary reports)<br>39 countries; NCT00412984                                                 | Apixaban 5mg x 2/day                                                                                                                                    | 9210 (65%)                                       | *70 (63-76)                                                          | 2758 (30%)                                                  | Primary: stroke, systemic embolism, major bleeding<br>Secondary: all-cause mortality, MI, any bleeding, liver function abnormalities, other AEs                                                                                                       |
|                                                                                                                                 | 2mg target INR 2.0-3.0                                                                                                                                  | 9081 (65%)                                       | * 70 (63-76)                                                         | 2744 (30%)                                                  |                                                                                                                                                                                                                                                       |
| ENGAGE AF-TIMI 48<br>Giugliano 2013<br>46 countries; NCT00781391                                                                | Edoxaban 60mg<br>Edoxaban 30mg<br>Dose halved in both groups for pts < 60kg or creatinine clearance of 30-50ml per minute or use of verapamil/quinidine | 4366 (62.1%)<br>4304 (61.2%)                     | *72 (64-78)<br>*72 (64-78)                                           | Mean (SD) 2.8 (1)<br>Mean (SD) 2.8 (1)                      | Primary: stroke, systemic embolism, major bleeding<br>Secondary: MI, all-cause mortality                                                                                                                                                              |
|                                                                                                                                 | Target INR 2.0-3.0                                                                                                                                      | 4395 (62.5%)                                     | *72 (64-78)                                                          | Mean (SD) 2.8 (1)                                           |                                                                                                                                                                                                                                                       |
| Rocket-AF<br>Patel 2011<br>45 countries; NCT00403767                                                                            | Rivaroxaban20mg (15mg in patients with creatinine clearance of 30-49ml per minute)                                                                      | 7131 (61%)                                       | *73 (65-78)                                                          | 6205 (87%)                                                  | Primary: Stroke or systemic embolism<br>Secondary: Ischaemic stroke, intracranial haemorrhage, major bleeding, gastrointestinal bleeding, MI, all-cause mortality                                                                                     |
|                                                                                                                                 | Target INR 2-3                                                                                                                                          | 7133 (60%)                                       | *73 (65-78)                                                          | 6197 (87%)                                                  |                                                                                                                                                                                                                                                       |
| J-Rocket AF<br>Hori 2012<br>Japan; NCT00494871                                                                                  | Rivaroxaban 15mg                                                                                                                                        | 639 (83%)                                        | **71.0 (34-89)                                                       | 542 84.8%                                                   | Primary: Stroke or systemic embolic event<br>Secondary: Ischaemic stroke, haemorrhagic stroke, systemic embolism, vascular death, mortality, myocardial infarction, major bleeding, gastrointestinal bleeding, clinically relevant non-major bleeding |
|                                                                                                                                 | Target INR 2-3 (1.6-2.6 if ≥ 70 years)                                                                                                                  | 639 (78%)                                        | **71.2 (43-90)                                                       | 524 82.0%                                                   |                                                                                                                                                                                                                                                       |
| Factor IIa Phase III trials                                                                                                     |                                                                                                                                                         |                                                  |                                                                      |                                                             |                                                                                                                                                                                                                                                       |
| RE-LY<br>Connolly 2009 + 5 secondary reports; 44 countries; NCT00262600                                                         | Dabigatran 110mg x 2/day<br>Dabigatran 150mg x 2/day                                                                                                    | 6015<br>6075                                     | 71.4 (8.6)<br>71.5 (8.8)                                             | 1968 (33%)<br>1981 (33%)                                    | Primary: Stroke or systemic embolism<br>Secondary: haemorrhagic stroke, all-cause mortality                                                                                                                                                           |
|                                                                                                                                 | 1, 3 or 5mg, target INR 2.0-3.0                                                                                                                         | 6022                                             | 71.6 (8.6)                                                           | 1933 (32%)                                                  |                                                                                                                                                                                                                                                       |
| Factor Xa Phase II trials                                                                                                       |                                                                                                                                                         |                                                  |                                                                      |                                                             |                                                                                                                                                                                                                                                       |
| ARISTOTLE-J<br>Ogawa 2011<br>Japan; NCT00787150                                                                                 | Apixaban 2.5mg x 2/day<br>Apixaban 5mg x 2/day                                                                                                          | 74 (85%)<br>74 (82%)                             | *69.3<br>70.0                                                        | 17 (23%)<br>23 (31%)                                        | Primary: Composite of major bleeding and clinically relevant non-major bleeding<br>Secondary: Ischaemic stroke, systemic embolism, MI, all-cause mortality                                                                                            |
|                                                                                                                                 | Target INR 2.0-3.0 (1.6-2.6 if ≥ 70 years)                                                                                                              | 74 (81%)                                         | 71.7                                                                 | 21 (28%)                                                    |                                                                                                                                                                                                                                                       |
| Edoxaban Asia<br>Chung 2011<br>Taiwan, Singapore, Hong Kong, South Korea; NCT00504556                                           | Edoxaban 30mg x 4/day<br>Edoxaban 60mg x 4/day                                                                                                          | 79 (65%)<br>80 (69%)                             | 64.9 (9.1)<br>65.9 (7.7)                                             | 22 (27.8%)<br>22 (27.5%)                                    | Primary: Major or clinically relevant, but non-major bleeding<br>Secondary: Ischaemic stroke, systemic embolism, MI, all-cause mortality                                                                                                              |
|                                                                                                                                 | Target INR 2.0                                                                                                                                          | 75 (62%)                                         | 64.5 (9.5)                                                           | 17 (22.7%)                                                  |                                                                                                                                                                                                                                                       |
| Edoxaban Japan<br>Yamashita 2012<br>Japan; No clinical trial registration identified. No reply from authors.                    | Edoxaban 30mg<br>Edoxaban 45mg<br>Edoxaban 60mg                                                                                                         | 110 (84.0%)<br>109 (81.3%)<br>107 (81.7%)        | 69.4<br>69.5<br>68.4                                                 | mean/median 1.9/2<br>mean/median 2.1/2<br>mean/median 2.1/2 | Primary: all bleeding<br>Secondary: thromboembolic events                                                                                                                                                                                             |
|                                                                                                                                 | Target INR 2.0-3.0                                                                                                                                      | 107 (82.9%)                                      | 68.8                                                                 | mean/median 2.2/2                                           |                                                                                                                                                                                                                                                       |
| Edoxaban US/Europe<br>Weitz 2010<br>USA, eastern Europe; NCT00504556                                                            | Edoxaban 30mg<br>Edoxaban 30mg x 2/day<br>Edoxaban 60mg<br>Edoxaban 60mg x 2/day                                                                        | 235 (60%)<br>245 (61%)<br>23 (66%)<br>180 (63%)  | 65.2 (8.3)<br>64.8 (8.8)<br>64.9 (8.8)<br>64.7 (9.0)                 | 87<br>88<br>87<br>67                                        | Primary: Major or clinically relevant, but non-major bleeding<br>Secondary: Ischaemic stroke, haemorrhagic stroke, systemic embolism, MI, all-cause mortality                                                                                         |
|                                                                                                                                 | Target INR 2-0                                                                                                                                          | 251 (60%)                                        | 66.0 (8.5)                                                           | 90                                                          |                                                                                                                                                                                                                                                       |
| Explore-Xa (Connolly 2013 + other secondary reports)<br>USA, Canada, Germany; NCT00742859                                       | Betrixaban 40mg<br>Betrixaban 60mg<br>Betrixaban 80mg                                                                                                   | 127 (62%)<br>127 (64%)<br>127 (70%)              | 73.3 (8.50)<br>73.8 (8.35)<br>72.0 (7.65)                            | 47 (37.0)<br>46 (36.2)<br>29 (23%)                          | Primary: Major or clinically relevant, but non-major bleeding<br>Secondary: Ischaemic stroke, haemorrhagic stroke, systemic embolism, MI, all-cause mortality.                                                                                        |
|                                                                                                                                 | Target INR 2-0                                                                                                                                          | 127 (70%)                                        | 72.7 (8.75)                                                          | 48 (38%)                                                    |                                                                                                                                                                                                                                                       |
| Turpie 2010<br>OPAL-1<br>Japan, Singapore, Malaysia, Taiwan, Korea, Hong Kong, New Zealand, Thailand, South Africa; NCT00448214 | YM150 30mg<br>YM150 60mg<br>YM150 120mg<br>YM150 240mg                                                                                                  | 90 (86%)<br>93 (76%)<br>93 (80%)<br>78 (77%)     | 69.3 (8.4)<br>68.4 (9.4)<br>67.0 (9.6)<br>67.4 (9.0)                 | 21 (23.3%)<br>19 (20.4%)<br>24 (25.8%)<br>18 (23.1%)        | Primary: Major or clinically relevant, but non-major bleeding<br>Secondary: Ischaemic stroke, haemorrhagic stroke, systemic embolism, MI, all-cause mortality                                                                                         |
|                                                                                                                                 | Target INR 2-0<br>1, 3 or 5mg, target INR 2.0-3.0                                                                                                       | 94 (77%)<br>6022                                 | 67.0 (9.4)<br>71.6 (8.6)                                             | 17 (18.1%)<br>1933 (32%)                                    |                                                                                                                                                                                                                                                       |
| Factor IIa Phase II trials                                                                                                      |                                                                                                                                                         |                                                  |                                                                      |                                                             |                                                                                                                                                                                                                                                       |
| Lip 2009; Austria, Denmark, Hungary, Ireland Norway, Poland, Russia, Sweden, UK; NCT00684307                                    | AZD0837 150mg once daily<br>AZD0837 300mg once daily<br>AZD0837 450mg once daily<br>AZD0837 200mg twice daily                                           | 166 (71%)<br>152 (69%)<br>157 (69%)<br>161 (67%) | **69.9 (43-93)<br>**69.8 (45-92)<br>**69.3 (45-88)<br>**67.8 (34-88) | NR                                                          | Primary: Major or clinically relevant, but non-major bleeding<br>Secondary: Ischaemic stroke, haemorrhagic stroke, systemic embolism, MI, all-cause mortality                                                                                         |
|                                                                                                                                 | Target INR 2-0                                                                                                                                          | 319 (68%)                                        | **68.3 (33-87)                                                       | NR                                                          |                                                                                                                                                                                                                                                       |

Supplementary Appendix Figure 3 Risk of Bias Summary Table One

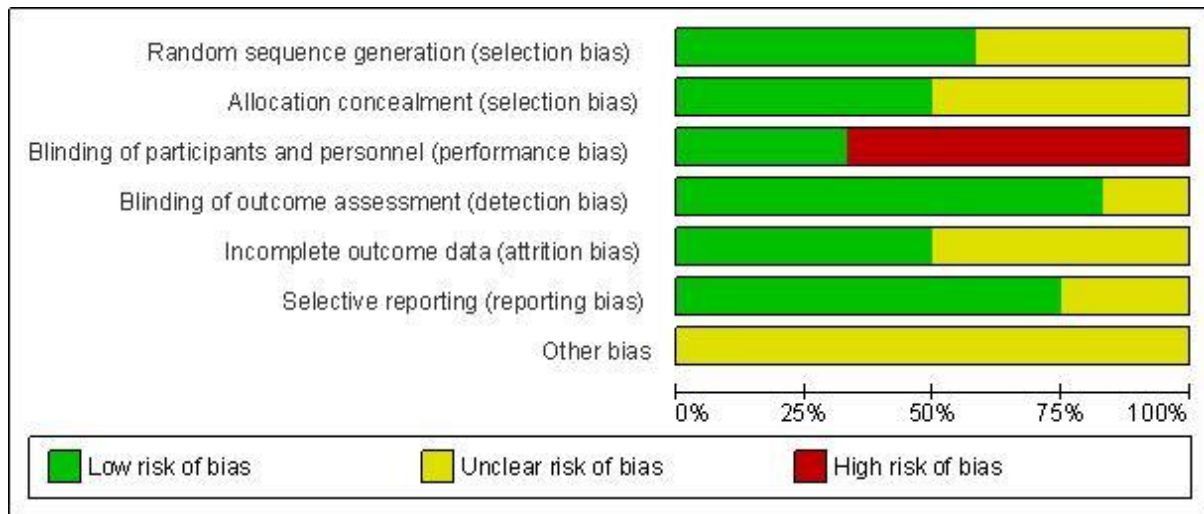

Supplementary Appendix Figure 4 Risk of Bias Summary Table Two

|                           | Random sequence generation (selection bias) | Allocation concealment (selection bias) | Blinding of participants and personnel (performance bias) | Blinding of outcome assessment (detection bias) | Incomplete outcome data (attrition bias) | Selective reporting (reporting bias) | Other bias |
|---------------------------|---------------------------------------------|-----------------------------------------|-----------------------------------------------------------|-------------------------------------------------|------------------------------------------|--------------------------------------|------------|
| ARISTOTLE 2011            | +                                           | +                                       | +                                                         | +                                               | +                                        | +                                    | ?          |
| ARISTOTLE-J 2011          | ?                                           | ?                                       | +                                                         | +                                               | ?                                        | ?                                    | ?          |
| Edoxaban Asia 2011        | ?                                           | ?                                       | +                                                         | +                                               | +                                        | +                                    | ?          |
| Edoxaban Japan 2012       | ?                                           | ?                                       | +                                                         | ?                                               | ?                                        | ?                                    | ?          |
| Edoxaban US/Europe 2010   | +                                           | +                                       | +                                                         | +                                               | ?                                        | +                                    | ?          |
| ENGAGE AF-TIMI 48 2013    | +                                           | +                                       | +                                                         | +                                               | ?                                        | +                                    | ?          |
| ExploreXa 2013 Betrixaban | +                                           | ?                                       | +                                                         | +                                               | +                                        | +                                    | ?          |
| J-Rocket AF 2012          | ?                                           | ?                                       | +                                                         | +                                               | +                                        | ?                                    | ?          |
| Lip 2009 - AZD0837        | +                                           | +                                       | +                                                         | +                                               | ?                                        | +                                    | ?          |
| OPAL-1 2010 - YM150       | ?                                           | ?                                       | +                                                         | ?                                               | +                                        | +                                    | ?          |
| RE-LY 2009                | +                                           | +                                       | +                                                         | +                                               | +                                        | +                                    | ?          |
| ROCKET AF 2011            | +                                           | +                                       | +                                                         | +                                               | ?                                        | +                                    | ?          |

# Supplementary Appendix Figure 5 Stroke or Systemic Embolism Fixed Effects Model

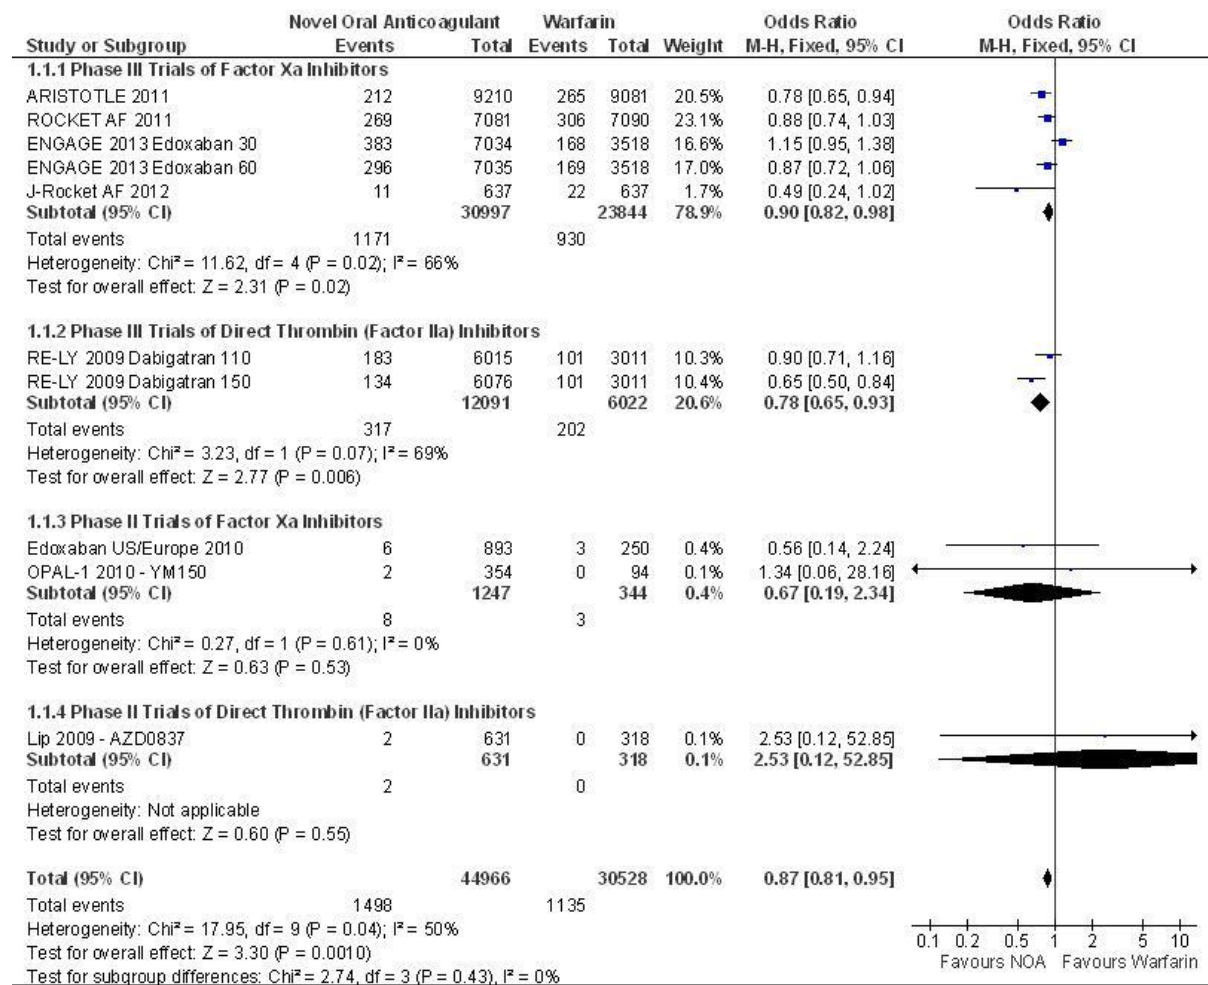

Supplementary Appendix Figure 6 Ischaemic Stroke Fixed Effects Model

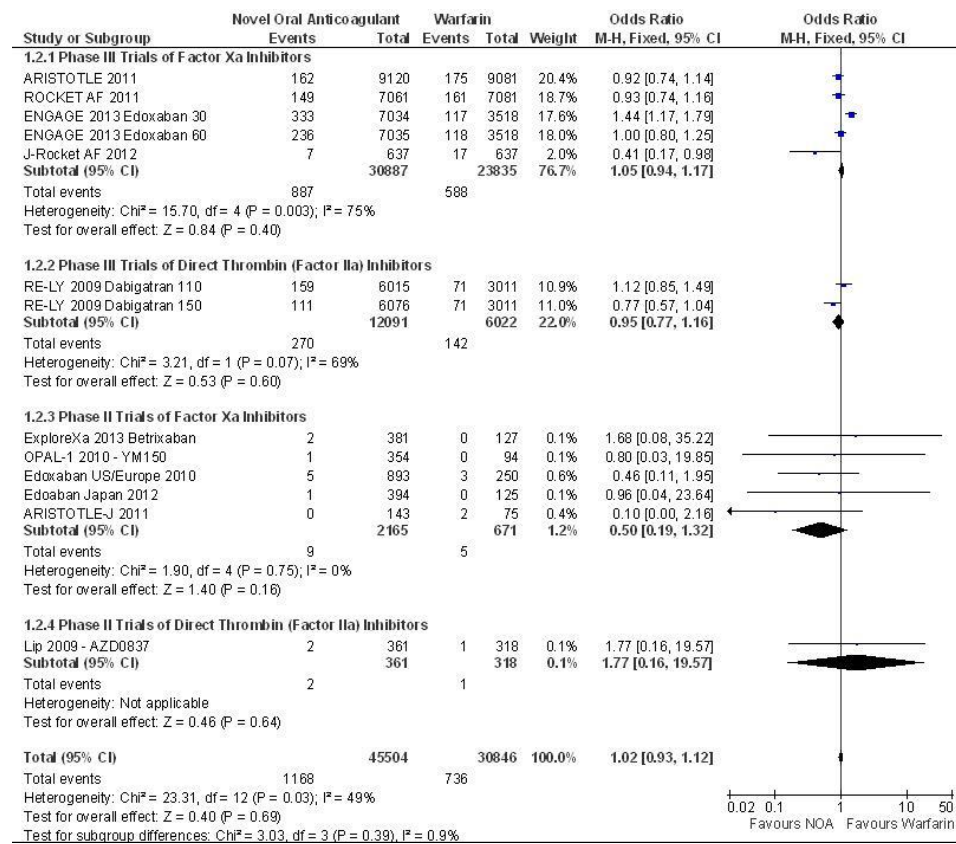

Supplementary Appendix Figure 7

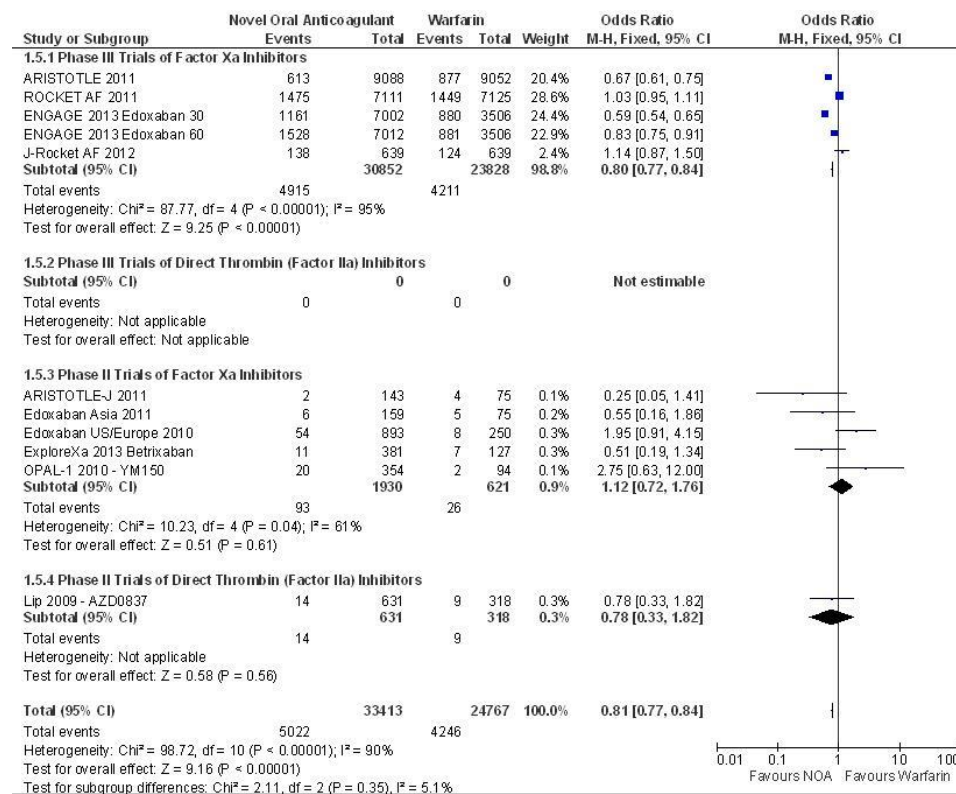



Supplementary Appendix Figure 8 Major or Clinically Relevant Non-Major Bleeding Random Effects Forest Plot

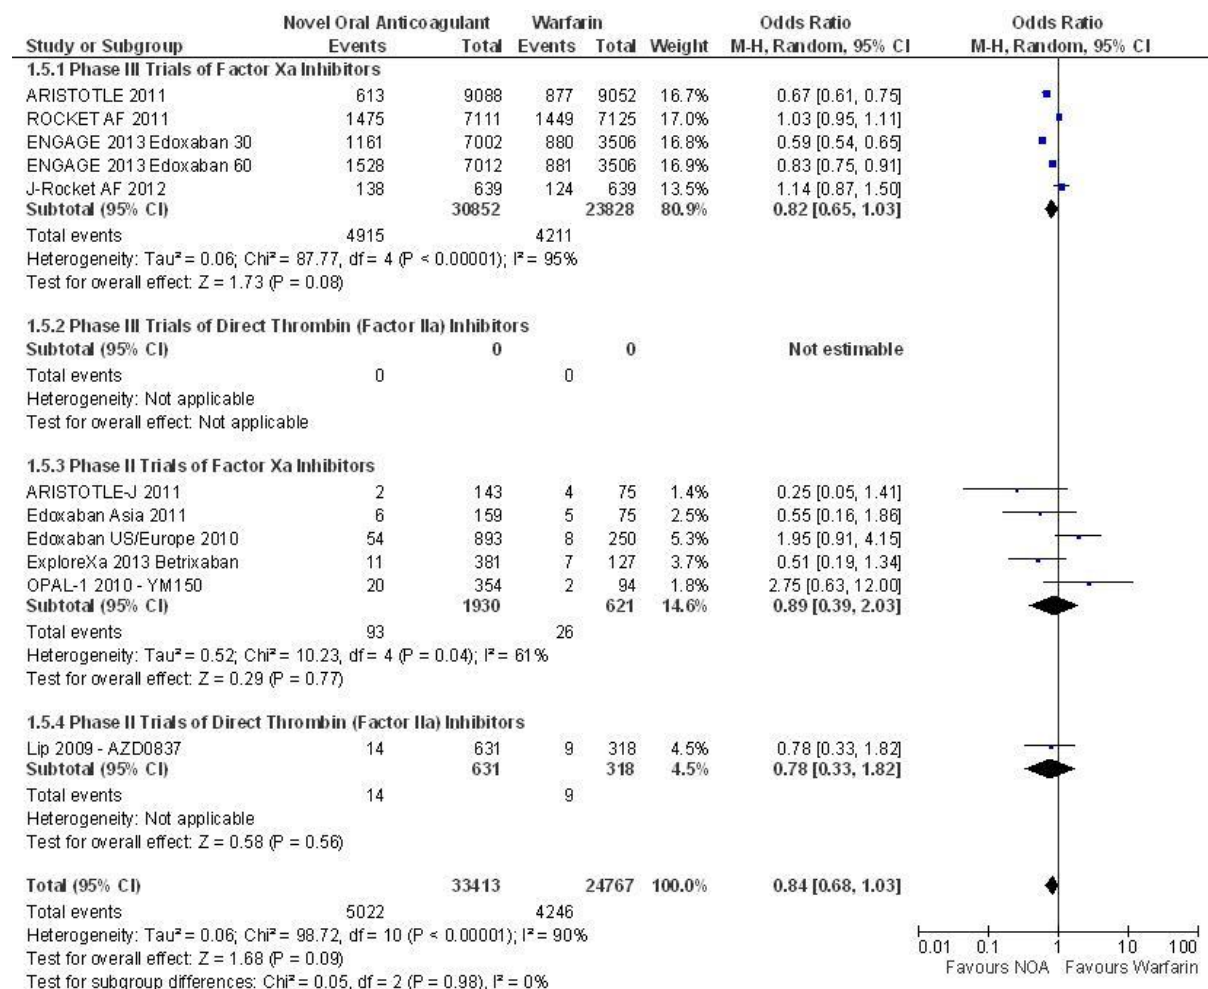

Supplementary Appendix Figure 9 Major Bleeding Fixed Effects Model Forest Plot

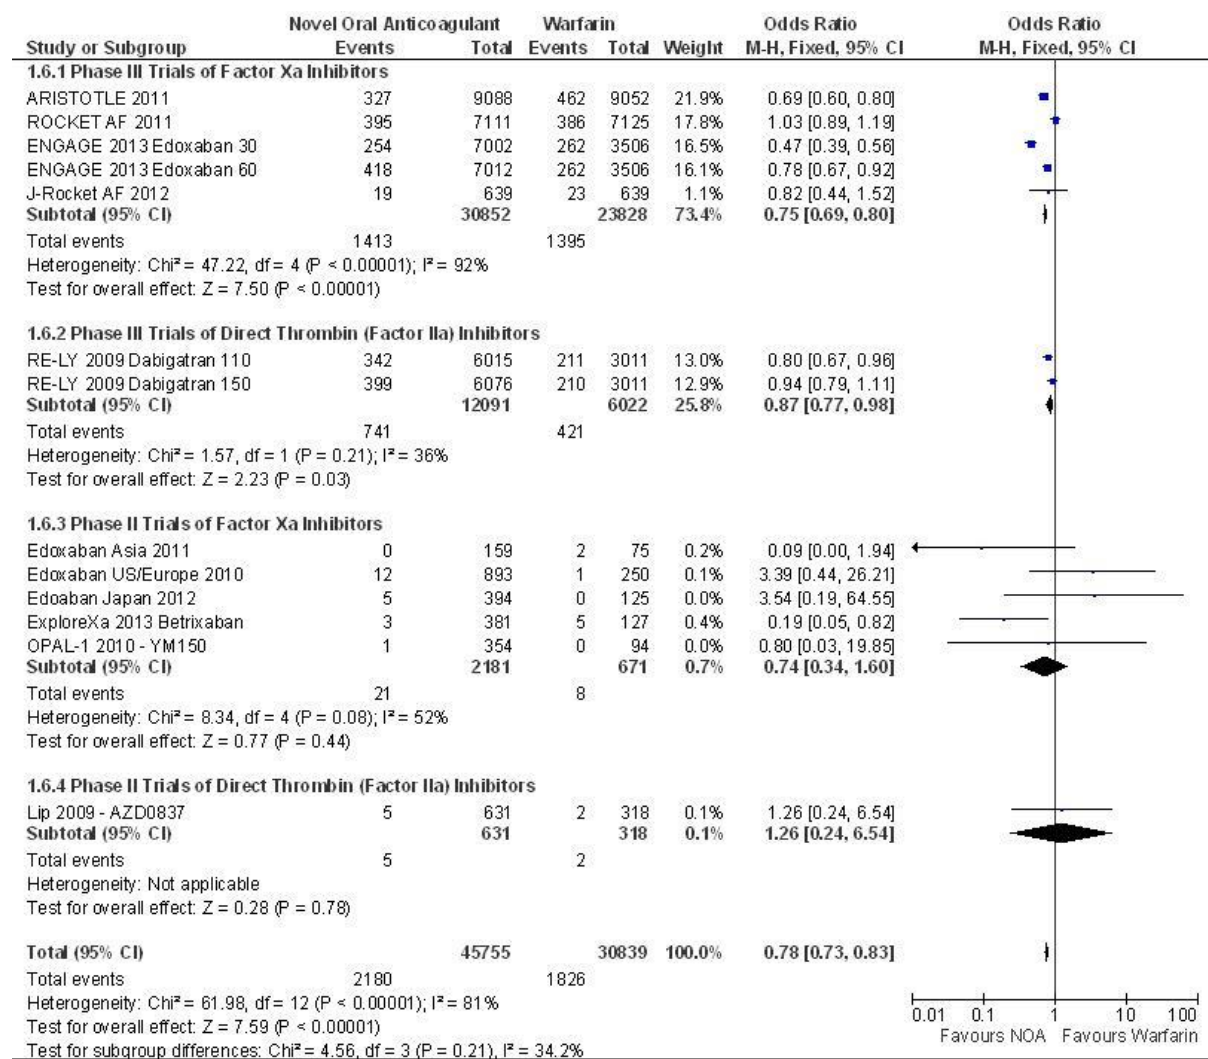

# Supplementary Appendix Figure 10 Major Bleeding Random Effects Model

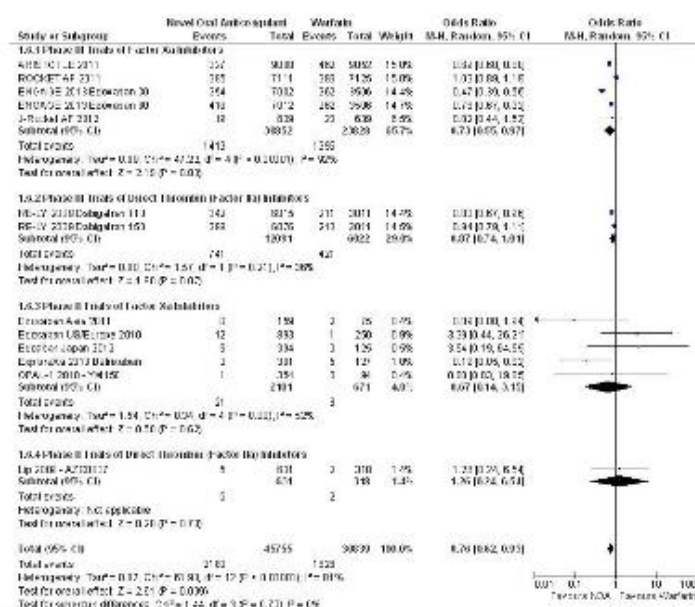

Supplementary Appendix Figure 10 Major Bleeding Random Effects Model



Supplementary Appendix Figure 11 Gastrointestinal Bleeding Fixed Effects Model Forest Plot

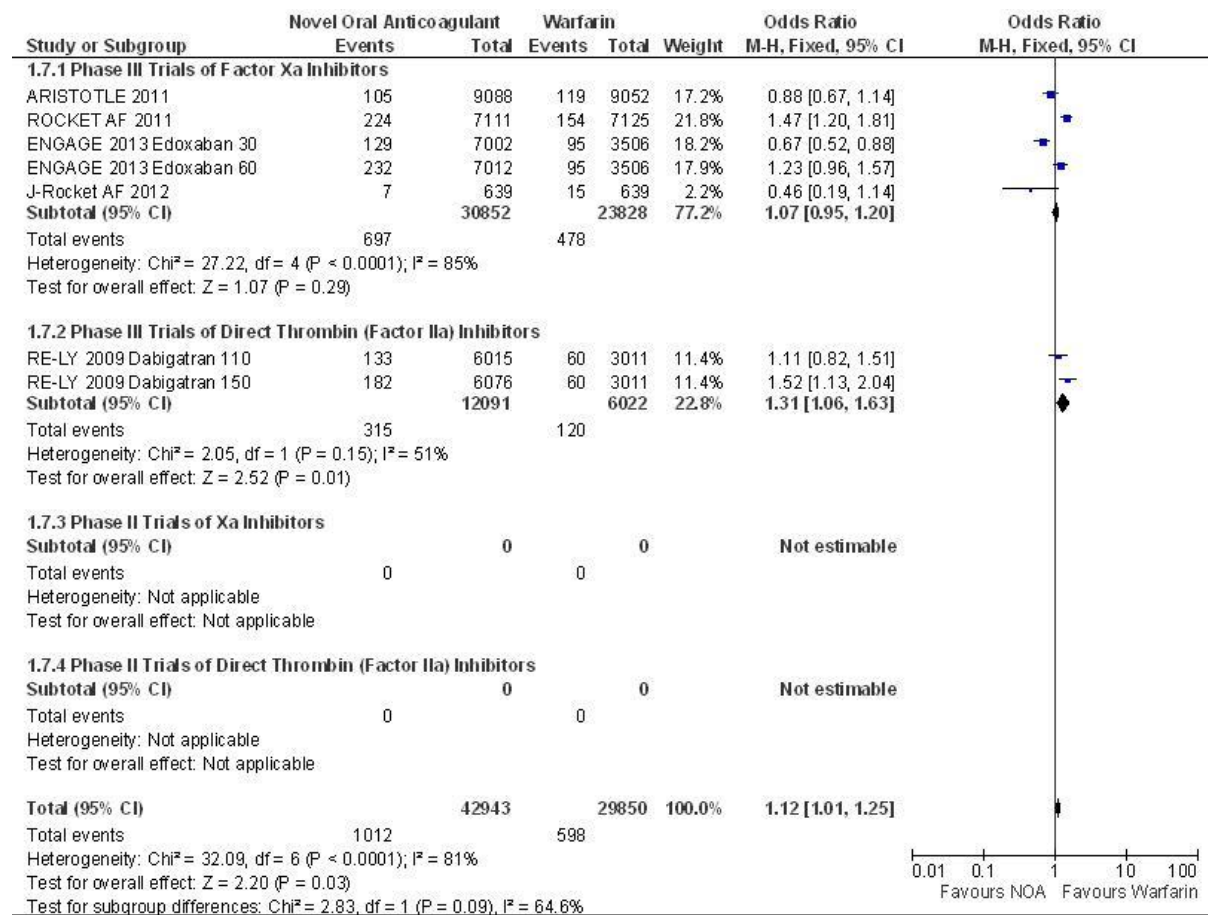

Supplementary Appendix Figure 12 Gastrointestinal Bleeding Random Effects Model Forest Plot

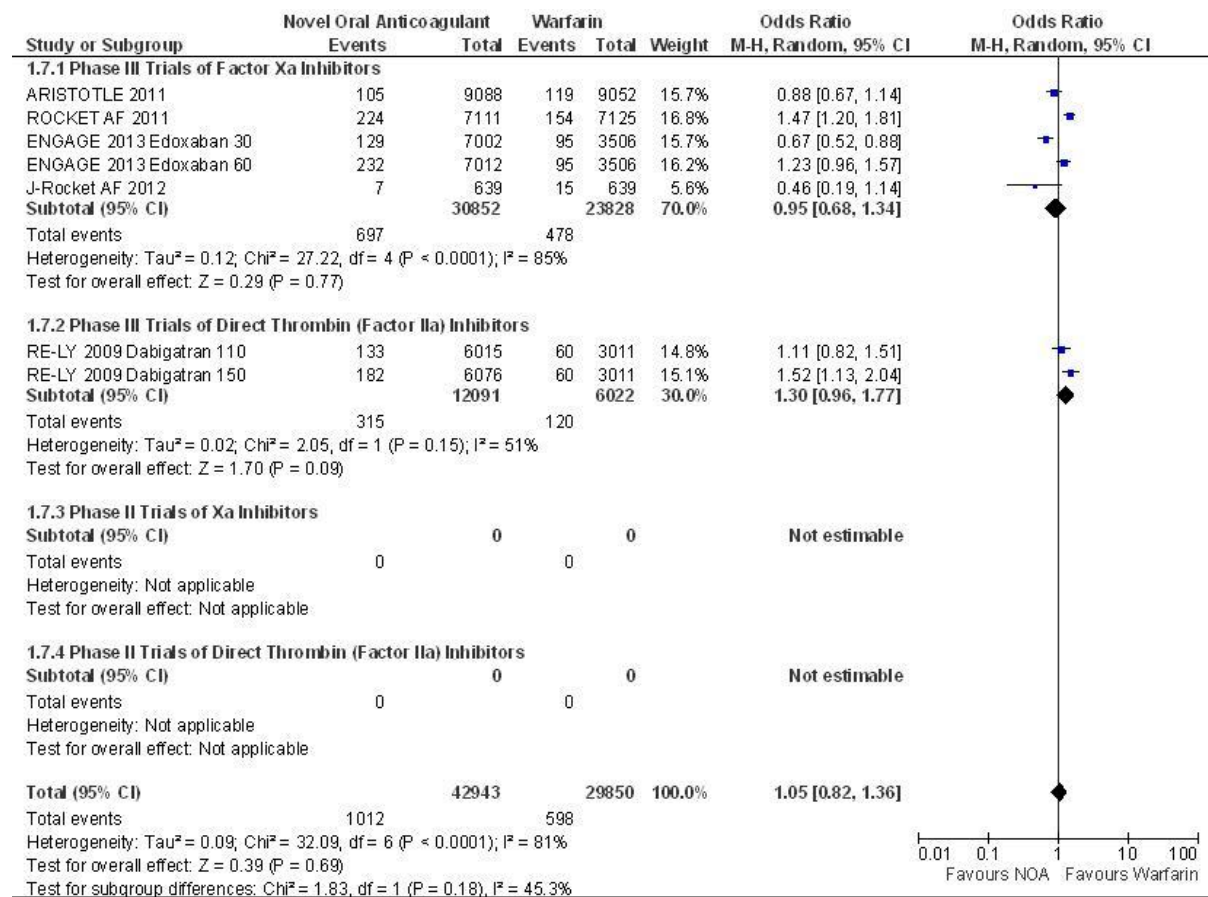

Supplementary Appendix Figure 13 Myocardial Infarction Fixed Effects Model Forest Plot

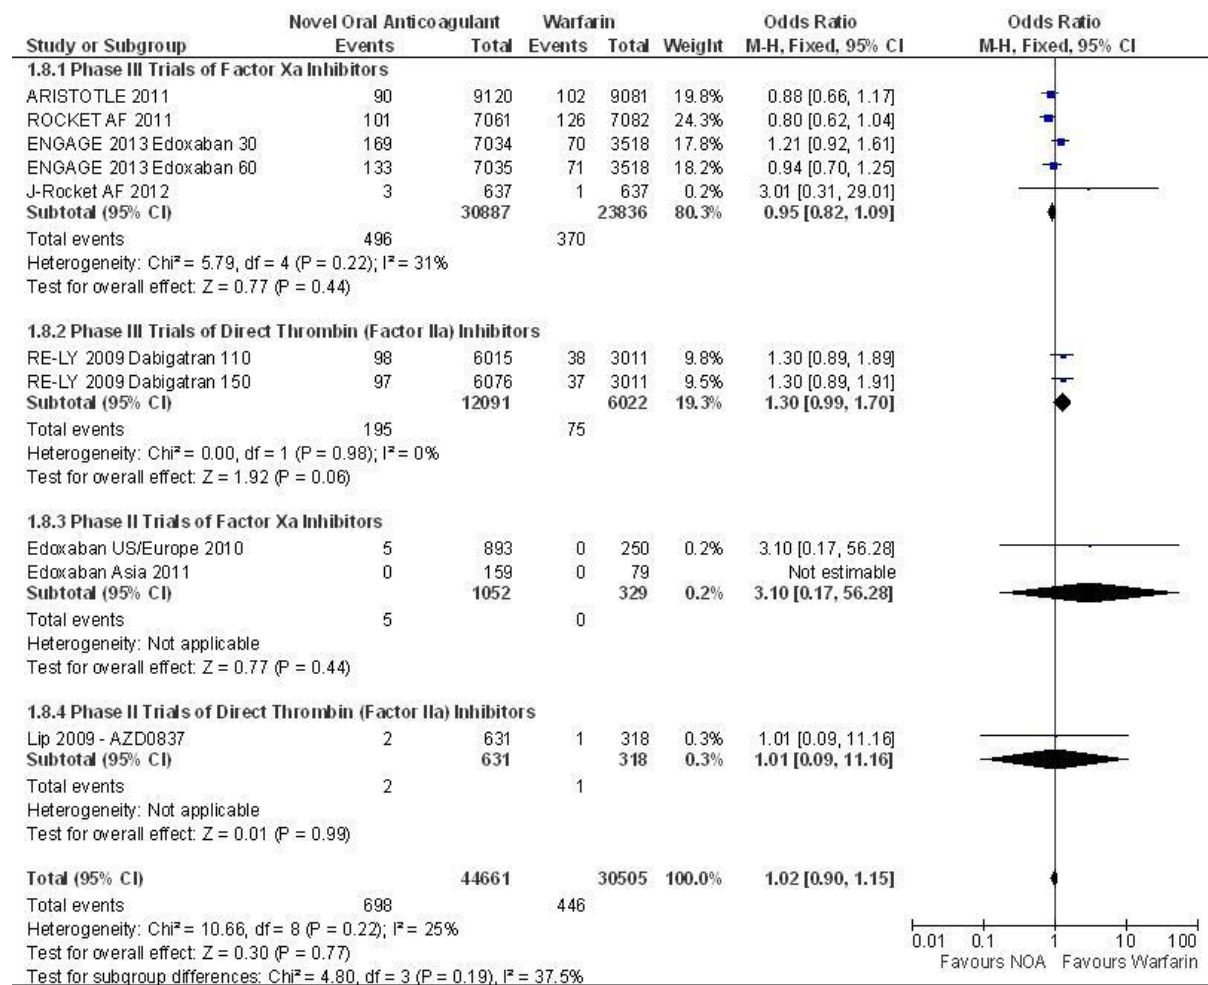

Supplementary Appendix Figure 14 Myocardial Infarction Random Effects Model Forest Plot

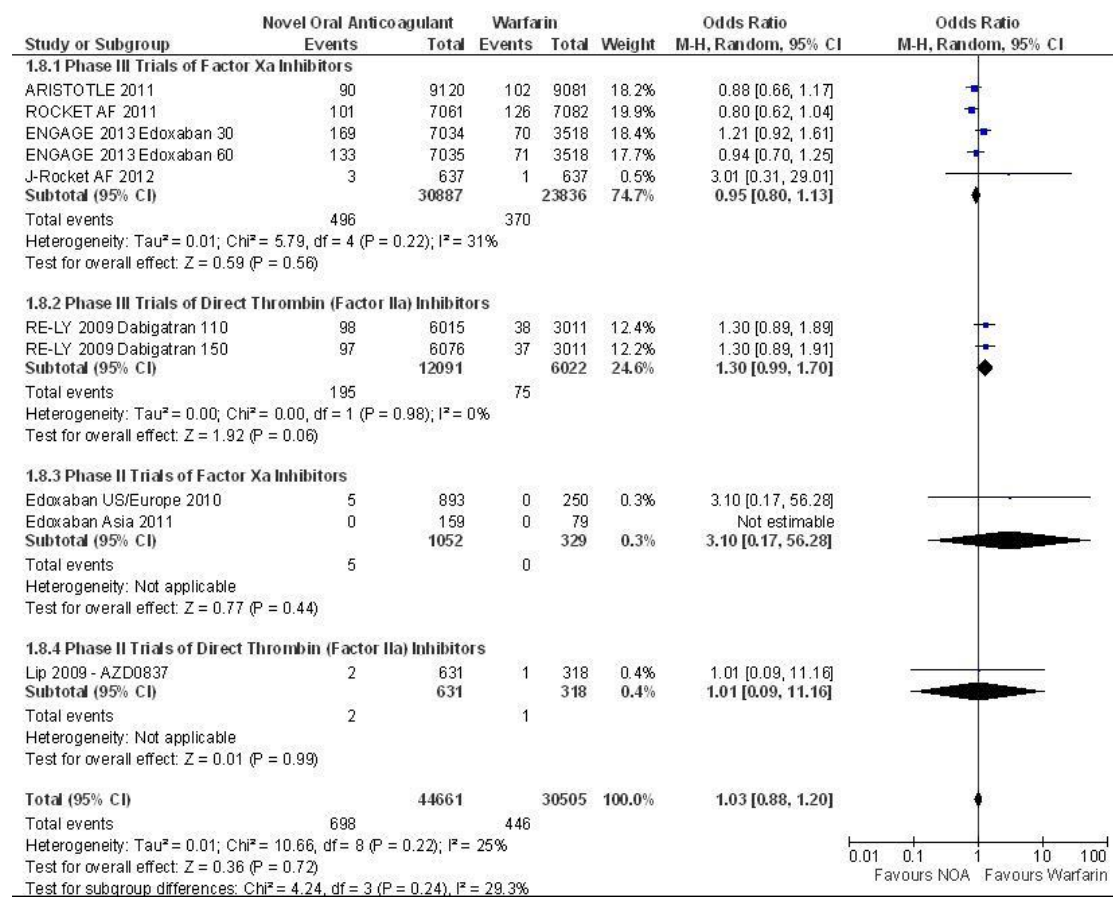

Supplement: openhrt-2015-000279supp.pdf [file openhrt-2015-000279supp.pdf]
